# Supplementary material for: Long non-coding RNA GAS5 and ZFAS1 are prognostic markers involved in translation targeted by miR-940 in prostate cancer
Source: PubMed Central journal article supplement (PMC5787418; doi:10.18632/oncotarget.23254), 2017-12-14
Supplement: oncotarget-09-1048-s001.pdf [file oncotarget-09-1048-s001.pdf]

# Long non-coding RNA *GAS5* and *ZFAS1* are prognostic markers involved in translation targeted by *miR-940* in prostate cancer

## SUPPLEMENTARY MATERIALS

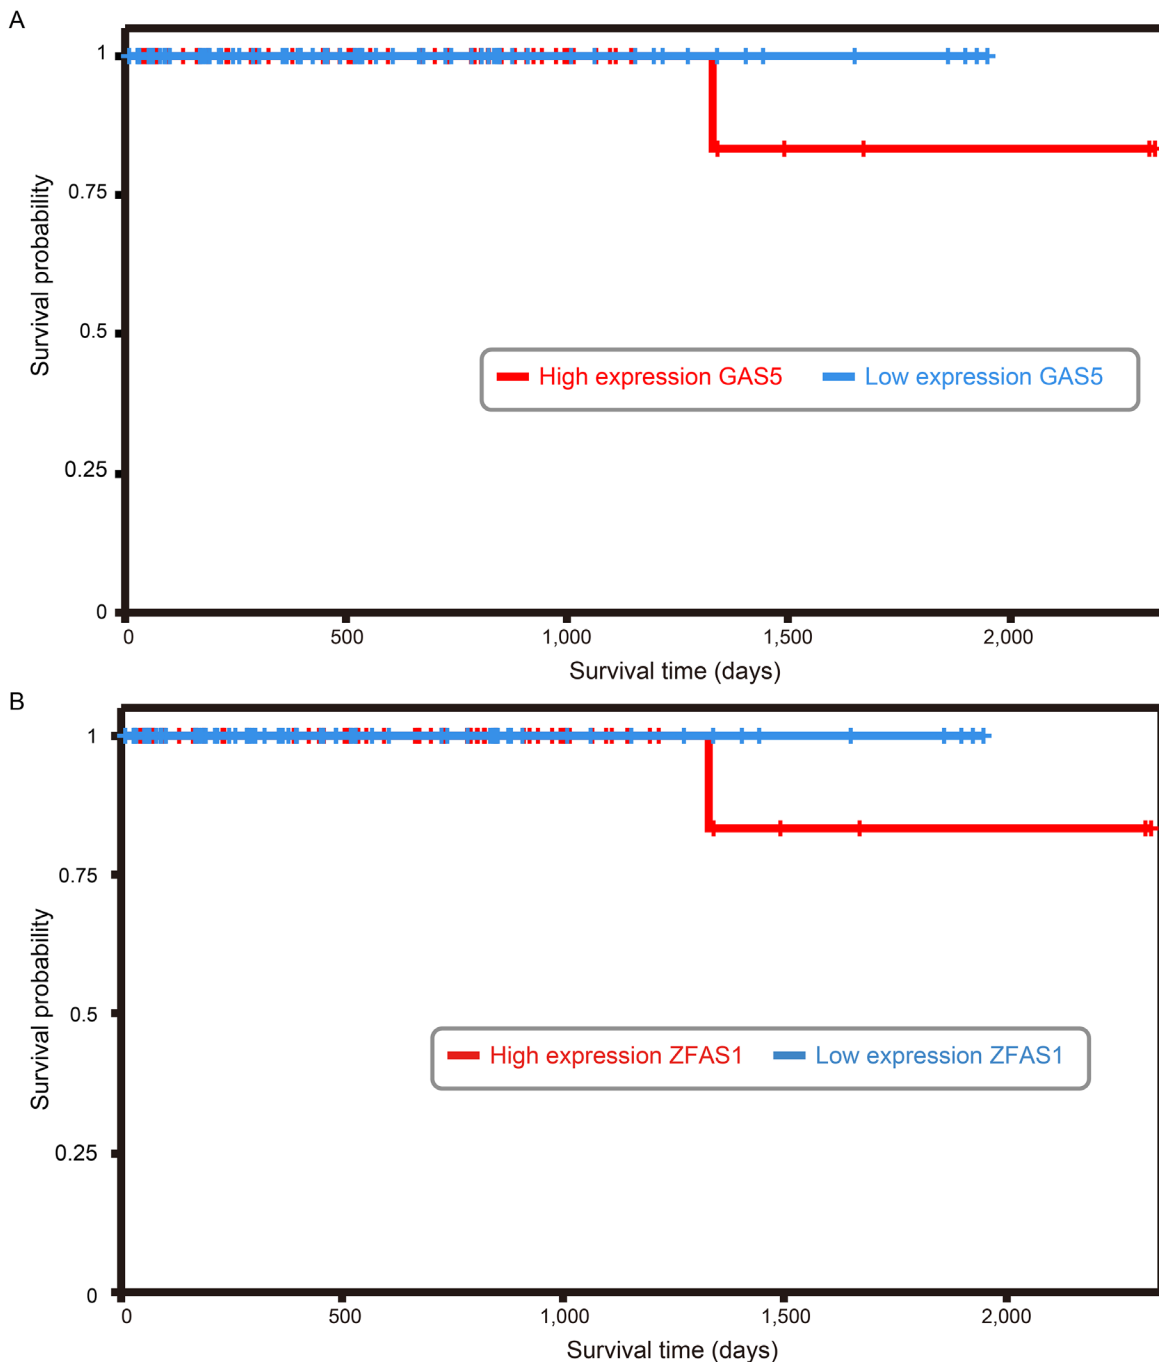

**Supplementary Figure 1: Overall survival of *ZFAS1* and *GAS5* based on TANRIC. (A) Patients with high *GAS5* expression have worse survival probability. (B) Patients with high *ZFAS1* expression have worse survival probability.**

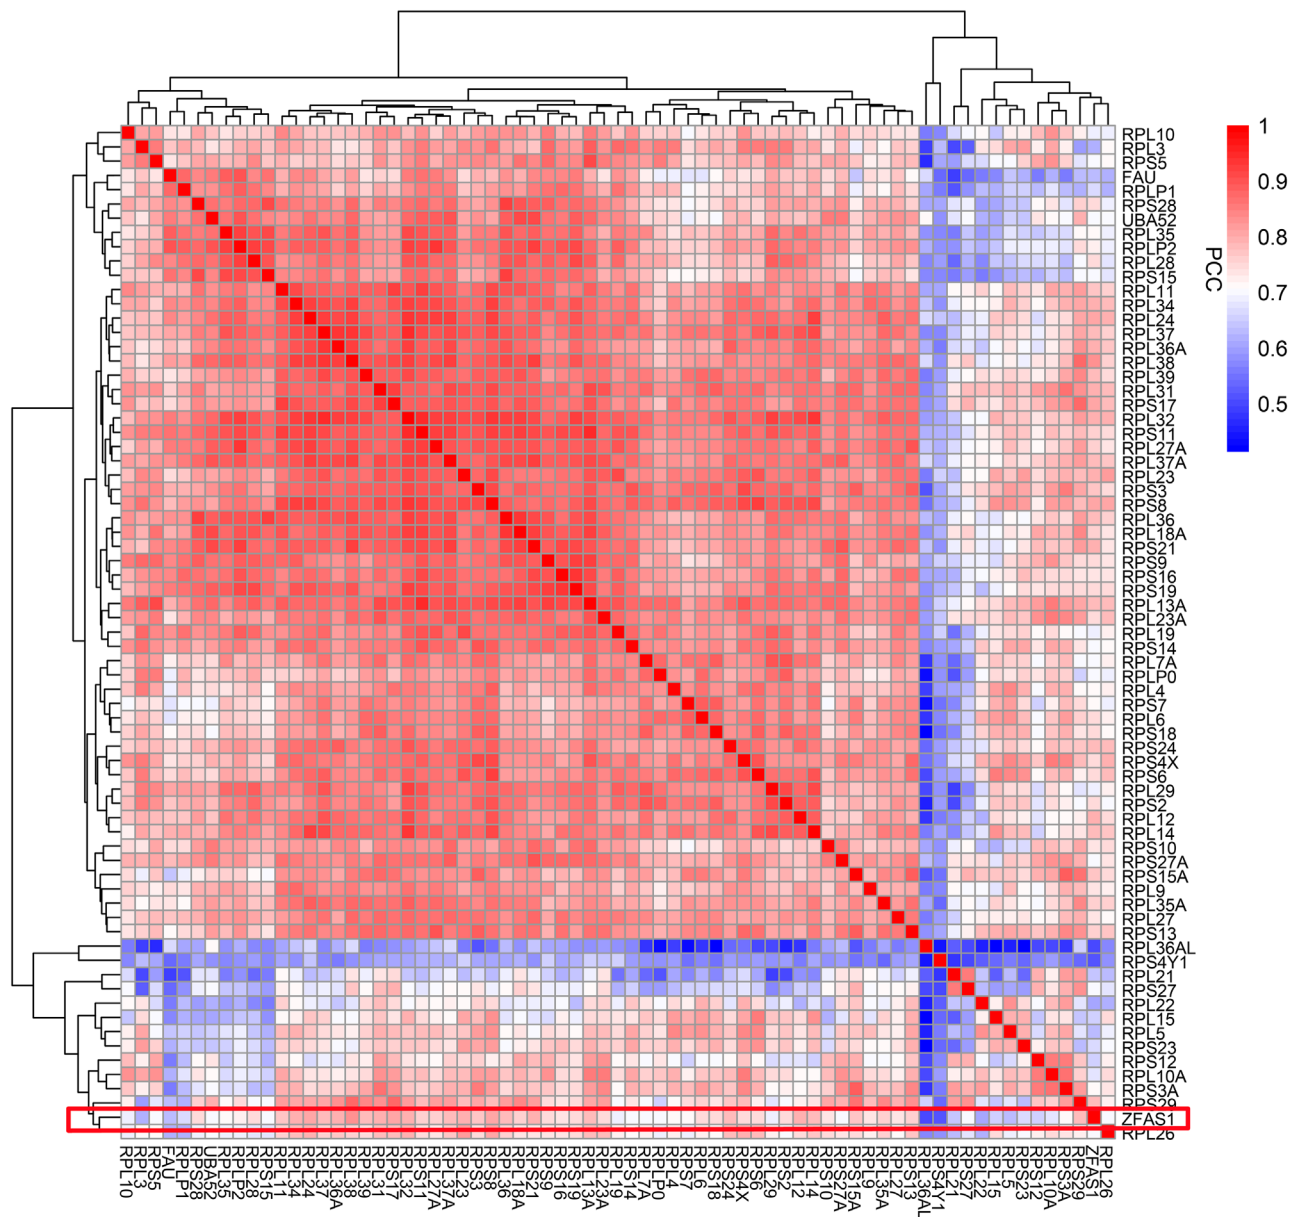

**Supplementary Figure 2: Expression correlation between *ZFAS1* and ribosome genes in the turquoise module.** The correlation is calculated using Pearson's correlation coefficient (PCC). *ZFAS1* is significantly correlated with ribosomal genes. ( $0.5 < PCC < 0.82$ ,  $p < 1e-9$ ).

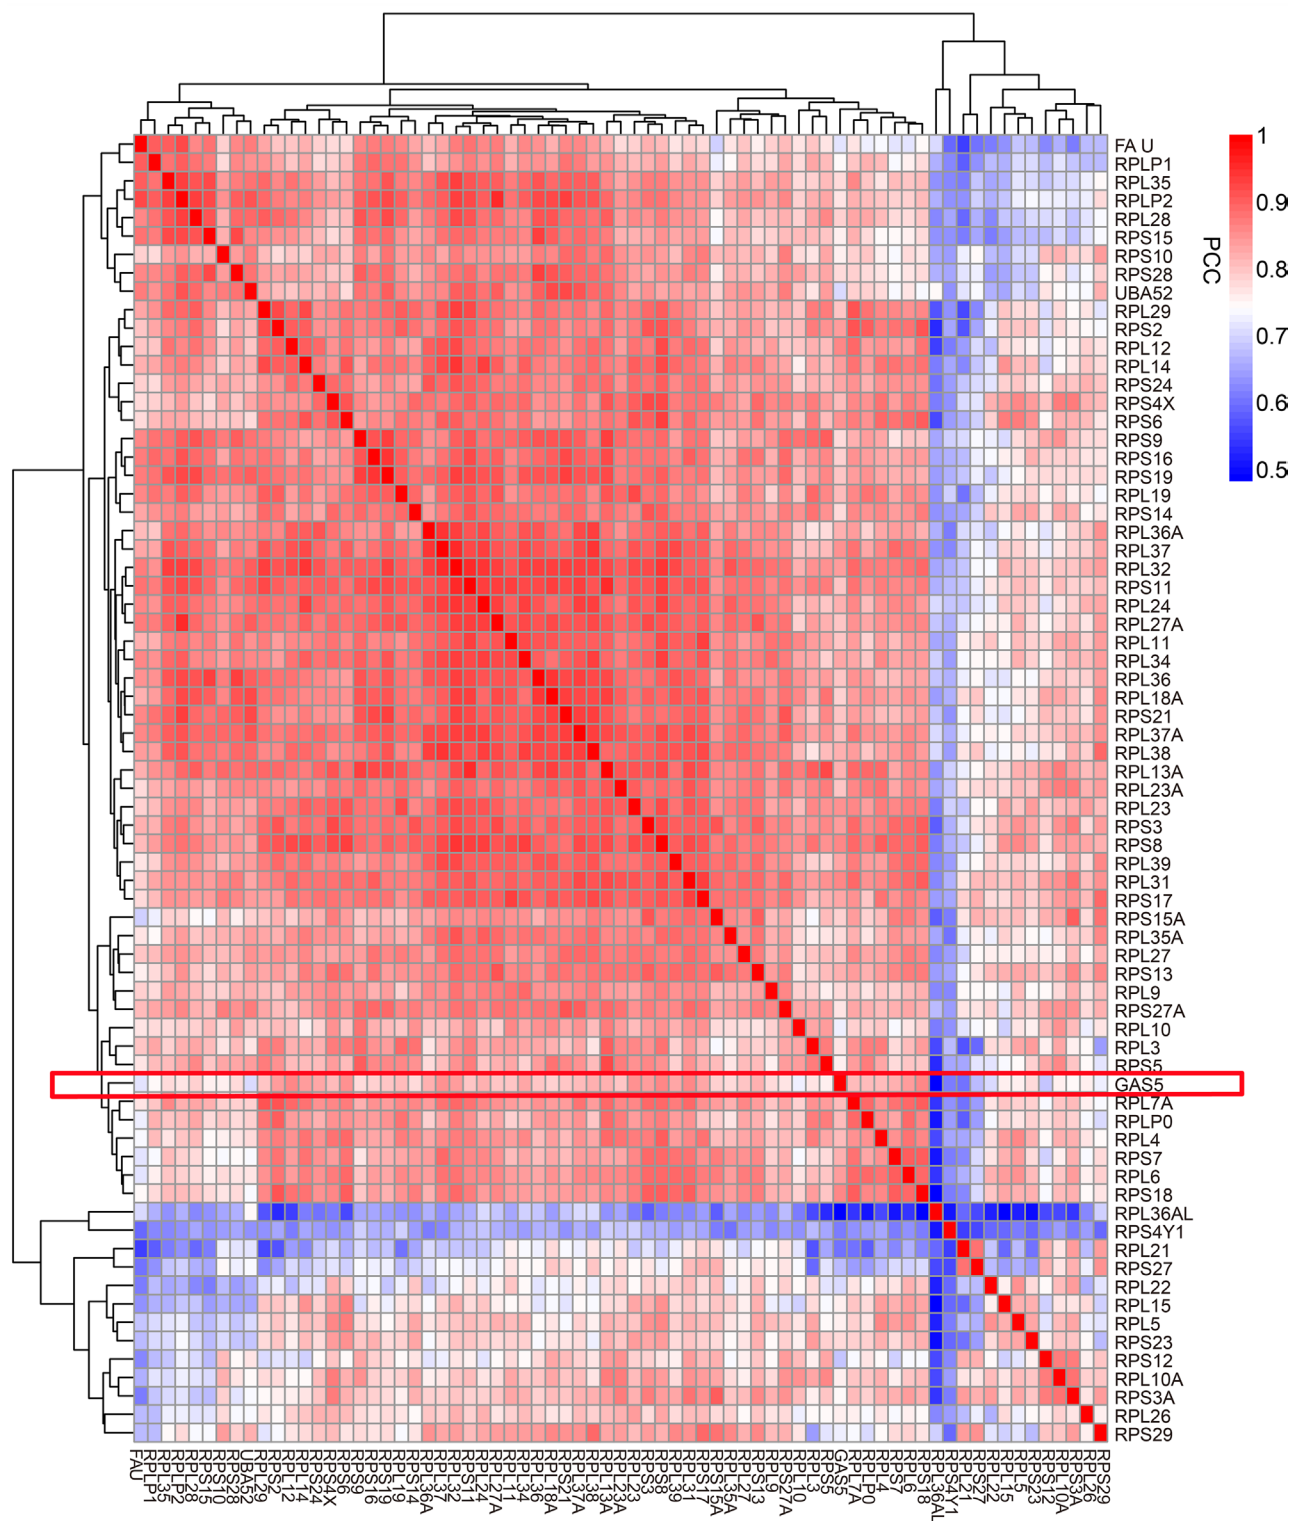

**Supplementary Figure 3: Expression correlation between *GAS5* and ribosome genes in the turquoise module.** The correlation is calculated using Pearson's correlation coefficient (PCC). *GAS5* is significantly correlated with ribosomal genes. ( $0.5 < PCC < 0.82$ ,  $p < 1e-9$ ).

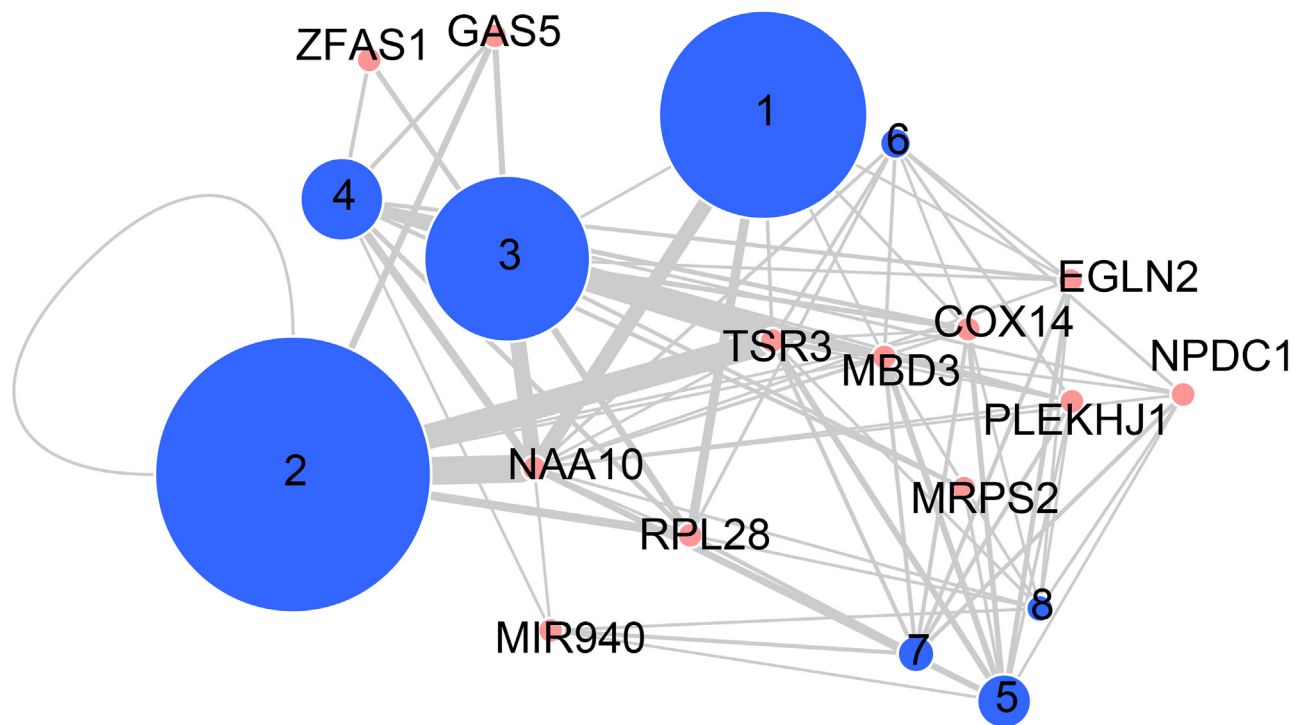

**Supplementary Figure 4: Simplified co-expression network of *GAS5*, *ZFAS1*, *miR-940* and target genes of *miR-940* in the turquoise module.** The co-expression network of the genes of interest was simplified using ThematicMap, which is a Cytoscape app used to simplify and visualize the complex gene co-expression network. Node 1 to 8 represents a gene set, respectively.

**Supplementary Table 1: Biological processes enriched by genes in the turquoise module according to enrichment analysis on Gene Ontology**

| Term                                                                                                      | Count | PValue   | Adjusted pvalue |
|-----------------------------------------------------------------------------------------------------------|-------|----------|-----------------|
| GO:0006412~translation                                                                                    | 96    | 1.36E-72 | 1.86E-69        |
| GO:0006414~translational elongation                                                                       | 72    | 8.76E-90 | 1.20E-86        |
| GO:0006396~RNA processing                                                                                 | 54    | 3.91E-16 | 6.08E-13        |
| GO:0055114~oxidation reduction                                                                            | 46    | 3.56E-09 | 4.87E-06        |
| GO:0006091~generation of precursor metabolites and energy                                                 | 40    | 1.14E-15 | 1.52E-12        |
| GO:0022613~ribonucleoprotein complex biogenesis                                                           | 30    | 7.41E-15 | 1.02E-11        |
| GO:0006119~oxidative phosphorylation                                                                      | 29    | 1.97E-21 | 2.69E-18        |
| GO:0022900~electron transport chain                                                                       | 29    | 1.75E-19 | 2.39E-16        |
| GO:0034470~ncRNA processing                                                                               | 29    | 1.45E-13 | 1.99E-10        |
| GO:0034660~ncRNA metabolic process                                                                        | 29    | 2.51E-11 | 3.43E-08        |
| GO:0042254~ribosome biogenesis                                                                            | 26    | 1.66E-15 | 2.28E-12        |
| GO:0015980~energy derivation by oxidation of organic compounds                                            | 26    | 9.69E-14 | 1.33E-10        |
| GO:0045333~cellular respiration                                                                           | 25    | 5.93E-17 | 1.52E-13        |
| GO:0042775~mitochondrial ATP synthesis coupled electron transport                                         | 23    | 1.54E-20 | 2.10E-17        |
| GO:0042773~ATP synthesis coupled electron transport                                                       | 23    | 1.54E-20 | 2.10E-17        |
| GO:0022904~respiratory electron transport chain                                                           | 23    | 4.69E-19 | 6.42E-16        |
| GO:0008380~RNA splicing                                                                                   | 23    | 9.62E-06 | 1.31E-02        |
| GO:0006397~mRNA processing                                                                                | 23    | 6.29E-05 | 8.26E-02        |
| GO:0006364~rRNA processing                                                                                | 22    | 3.36E-14 | 4.59E-11        |
| GO:0016072~rRNA metabolic process                                                                         | 22    | 8.30E-14 | 1.14E-10        |
| GO:0006120~mitochondrial electron transport, NADH to ubiquinone                                           | 19    | 7.54E-18 | 1.03E-14        |
| GO:0031396~regulation of protein ubiquitination                                                           | 13    | 1.58E-05 | 2.15E-02        |
| GO:0051443~positive regulation of ubiquitin-protein ligase activity                                       | 12    | 2.53E-06 | 3.46E-03        |
| GO:0051351~positive regulation of ligase activity                                                         | 12    | 3.87E-06 | 5.29E-03        |
| GO:0031397~negative regulation of protein ubiquitination                                                  | 12    | 4.44E-06 | 6.06E-03        |
| GO:0051438~regulation of ubiquitin-protein ligase activity                                                | 12    | 7.50E-06 | 1.02E-02        |
| GO:0051340~regulation of ligase activity                                                                  | 12    | 1.09E-05 | 1.48E-02        |
| GO:0031398~positive regulation of protein ubiquitination                                                  | 12    | 1.55E-05 | 2.10E-02        |
| GO:0031145~anaphase-promoting complex-dependent proteasomal ubiquitin-dependent protein catabolic process | 11    | 8.84E-06 | 1.20E-02        |
| GO:0051436~negative regulation of ubiquitin-protein ligase activity during mitotic cell cycle             | 11    | 8.84E-06 | 1.20E-02        |
| GO:0051444~negative regulation of ubiquitin-protein ligase activity                                       | 11    | 1.17E-05 | 1.59E-02        |
| GO:0051352~negative regulation of ligase activity                                                         | 11    | 1.17E-05 | 1.59E-02        |
| GO:0051437~positive regulation of ubiquitin-protein ligase activity during mitotic cell cycle             | 11    | 1.34E-05 | 1.81E-02        |
| GO:0051439~regulation of ubiquitin-protein ligase activity during mitotic cell cycle                      | 11    | 1.97E-05 | 2.67E-02        |
| GO:0042274~ribosomal small subunit biogenesis                                                             | 9     | 4.09E-11 | 5.60E-08        |
| GO:0042273~ribosomal large subunit biogenesis                                                             | 7     | 7.21E-08 | 9.88E-05        |
